# Supplementary material for: Perovskite LaCoO3 nanoparticles as enzyme mimetics: their catalytic properties, mechanism and application in dopamine biosensing
Source: Royal Society of Chemistry journal article supplement (doi:10.1039/c7nj01177f), 2017-01-01
Supplement: c7nj01177f1.pdf [file c7nj01177f1.pdf]

## Electronic Supplementary Information (ESI) for New Journal of Chemistry

### **Perovskite $\text{LaCoO}_3$ nanoparticles as enzyme mimetics: catalytic properties, mechanism and its application in biosensing for dopamine**

Kuiyuan Wang<sup>a</sup>, Jinzhu Song<sup>b</sup>, Xijian Duan<sup>a</sup>, Jianshuai Mu<sup>c</sup>, Yan Wang<sup>a,\*</sup>

MIIT Key Laboratory of Critical Materials Technology for New Energy  
Conversion and storage, School of Chemistry and Chemical Engineering, Harbin  
Institute of Technology, Harbin 150001, P.R.China.

E-mail address: wangy\_msn@hit.edu.cn

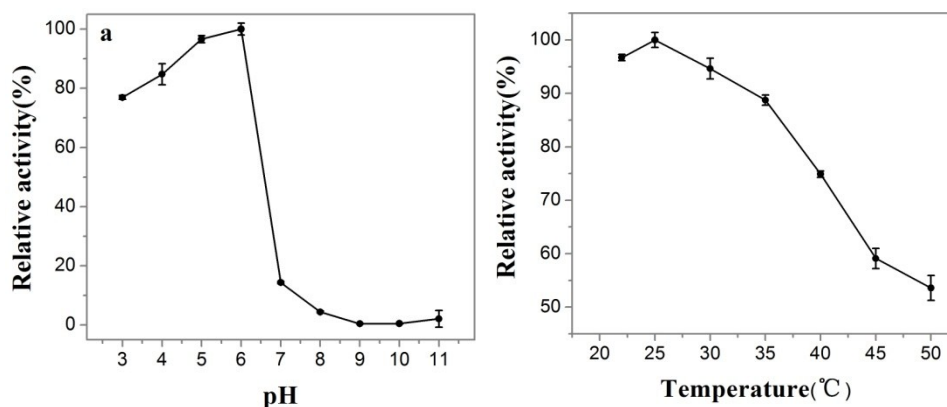

**Fig. S1** Effects of (a) pH and (b) temperature on the peroxidase-like activity of LCO NPs.

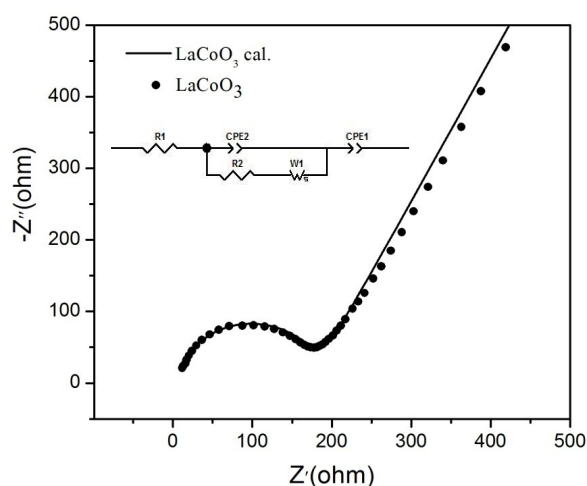

**Fig. S2** (a) Nyquist plots of the LCO measured; The inset is the Equivalent circuit model of LCO modified electrode.

**Table S1.** Comparison of the kinetic parameters of different artificial peroxidase and HRP using TMB as substrate

| catalyst                               | $K_m(\text{mM})$       |       | $V_{\max}(10^{-8}\text{M}\cdot\text{s}^{-1})$ |       | reference |
|----------------------------------------|------------------------|-------|-----------------------------------------------|-------|-----------|
|                                        | $\text{H}_2\text{O}_2$ | TMB   | $\text{H}_2\text{O}_2$                        | TMB   |           |
| HRP                                    | 3.7                    | 0.43  | 8.71                                          | 10    | 1         |
| $\text{Co}_3\text{O}_4$                | 24.64                  | 0.3   | 7.30                                          | 7.82  | 2         |
| $\text{Co}_x\text{Fe}_{3-x}\text{O}_4$ | 0.078                  | 0.024 | 0.793                                         | 0.564 | 3         |
| LCO                                    | 15.0                   | 0.24  | 35.0                                          | 34.9  | This work |

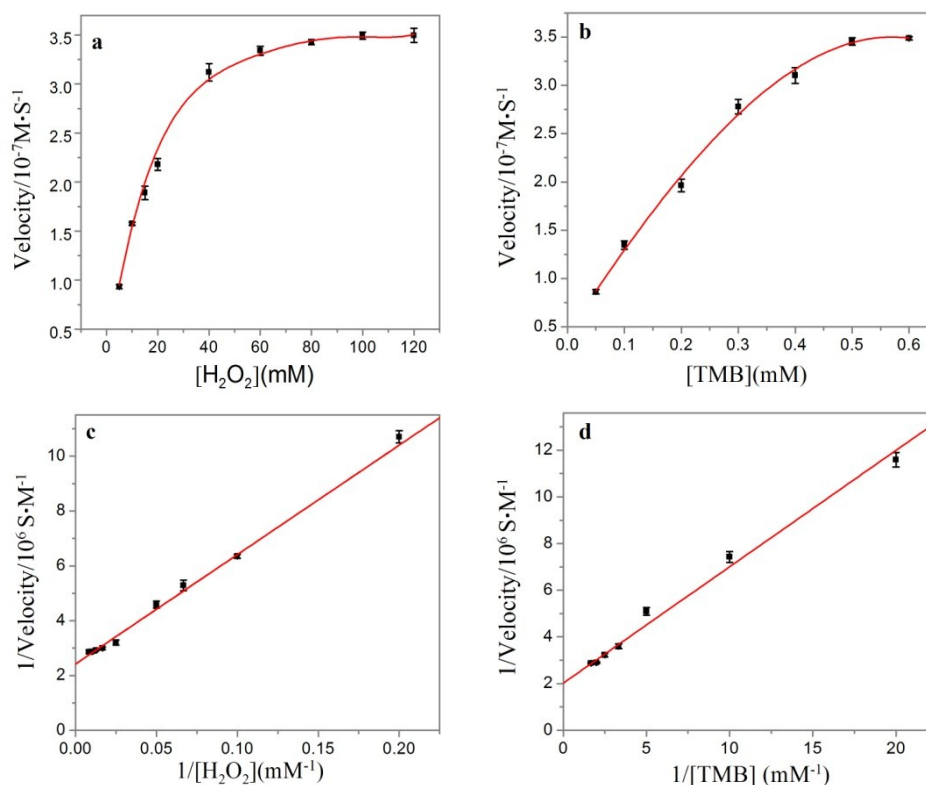

**Fig. S3** Steady state kinetic assay of LCO NPs. (a) Constant concentration of H<sub>2</sub>O<sub>2</sub> (100 mM) and the TMB concentration was varied (b) Constant concentration of TMB (0.5 mM) and the H<sub>2</sub>O<sub>2</sub> concentration was varied. Double reciprocal plot of peroxidase mimic activity of LCO NPs with the (c) constant concentration of H<sub>2</sub>O<sub>2</sub> (100 mM) and varying concentrations of TMB (d) constant concentration of TMB (0.5 mM) and varying concentrations of H<sub>2</sub>O<sub>2</sub>. The reactions were carried out with 10 µg/mL LCO NPs in 3 mL of 100mM NaAc-HAc buffer at pH=6.0.

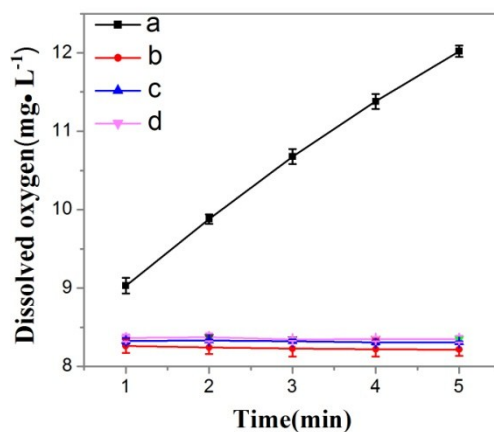

**Fig. S4** Oxygen generation in different reaction systems: (a) LCO + H<sub>2</sub>O<sub>2</sub>, (b) LCO, (c) H<sub>2</sub>O<sub>2</sub>, (d) leachate of LCO + H<sub>2</sub>O<sub>2</sub>. Reaction conditions: 20 μg·mL<sup>-1</sup> LCO NPs, 10 mM H<sub>2</sub>O<sub>2</sub> in 100 mM Na<sub>2</sub>HPO<sub>4</sub>-NaH<sub>2</sub>PO<sub>4</sub> buffer (pH 10.0).

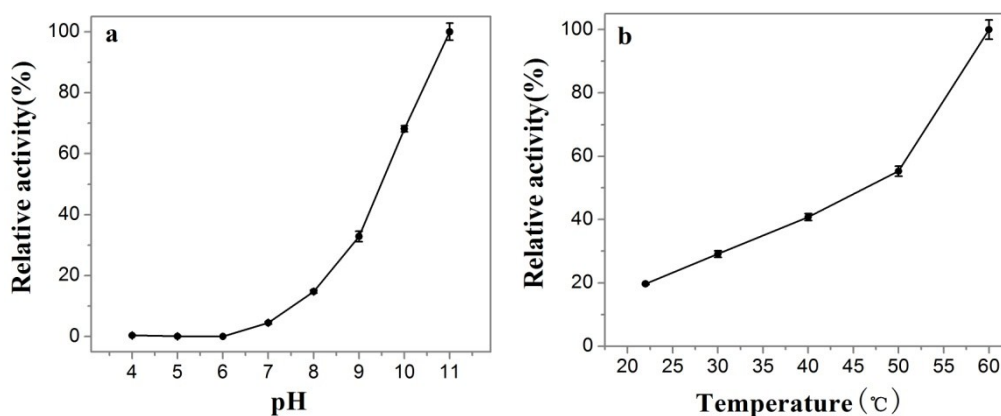

**Fig. S5** Effects of (a) pH and (b) temperature on the catalase-like activity of LCO NPs.

## References

- 1 L.Z. Gao, J. Zhuang, L. Nie, J.B. Zhang, Y. Zhang, N. Gu, T.H. Wang, J. Feng and D.L. Yang, S. Perrett, X. Yan, Nat. Nanotechnol., 2007, **2**, 577-583.
- 2 J.X. Xie, H.Y. Cao, H. Jiang, Y.J. Chen, W.B. Shi, H.Z. Zheng, and Y.M. Huang, Anal. Chim. Acta, 2013, **796**, 92-100.
- 3 T. Wang, P. Su, H. Li, Y. Yang and Y. Yang, New J. Chem., 2016, **40**, 10056-10063.
